# Supplementary material for: The effect of the support structure on catalytic activity: a case study on hollow and solid MoO3/SiO2
Source: Royal Society of Chemistry journal article supplement (doi:10.1039/c5ra17973d), 2016-01-01
Supplement: c5ra17973d1.pdf [file c5ra17973d1.pdf]

## Supporting Information for “The effect of support structure on catalytic activity: A case study on hollow and solid MoO<sub>3</sub>/SiO<sub>2</sub>”

Jiasheng Wang\* and Hong Liu

State Key Laboratory of Fine Chemicals, Dalian University of Technology, Panjin, 124221 (P.R. China)

E-mail: [jswang@dlut.edu.cn](mailto:jswang@dlut.edu.cn)

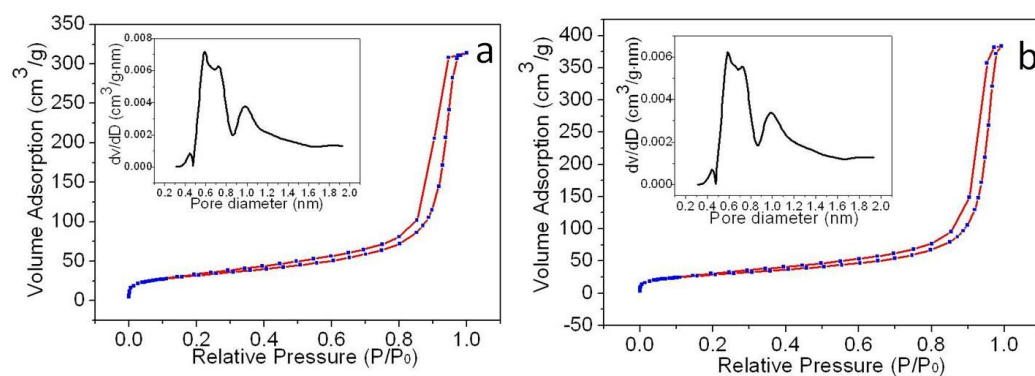

**Fig. S1** N<sub>2</sub> sorption isotherm of (a) H-MoO<sub>3</sub>/SiO<sub>2</sub> and (b) S-MoO<sub>3</sub>/SiO<sub>2</sub>. The insets show the corresponding HK curves, respectively.
